# Supplementary material for: Ni–Co–O solid solution dispersed nanocrystalline Co3O4 as a highly active catalyst for low-temperature propane combustion
Source: Royal Society of Chemistry journal article supplement (doi:10.1039/c8cy01062e), 2018-01-01
Supplement: c8cy01062e1.pdf [file c8cy01062e1.pdf]

## Ni-Co-O solid solution dispersed nanocrystalline $\text{Co}_3\text{O}_4$ as highly active catalyst for low-temperature propane combustion

Ting Cai<sup>a,b</sup>, Jing Yuan<sup>b</sup>, Lin Zhang<sup>a</sup>, Ling Yang<sup>b</sup>, Qin Tong<sup>b</sup>, Meiyong Ge<sup>b</sup>, Bei Xiao<sup>a</sup>, Xiaolan Zhang<sup>a</sup>, Kunfeng Zhao<sup>a,b,\*</sup>, Dannong He<sup>a,b,\*</sup>

<sup>a</sup> School of Material Science and Engineering, Shanghai Jiao Tong University, No.800 Dongchuan Road, Shanghai 200240, PR China

<sup>b</sup> National Engineering Research Center for Nanotechnology, No. 28 East Jiang Chuan Road, Shanghai 200241, PR China

\*Corresponding authors: Tel: 86 21 34291286; Fax: 86 21 34291125

E-mail: [hdn\\_nercn@163.com](mailto:hdn_nercn@163.com) (Dannong He), [zhaokunfeng-gl@163.com](mailto:zhaokunfeng-gl@163.com) (Kunfeng Zhao)

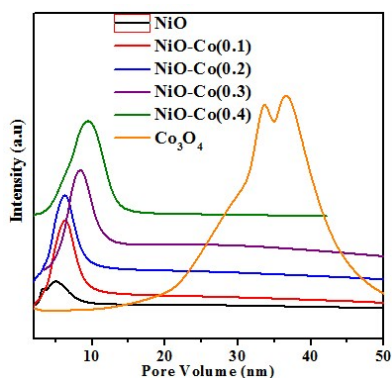

Fig. S1. The pore diameter distribution of NiO-Co(x) catalysts.

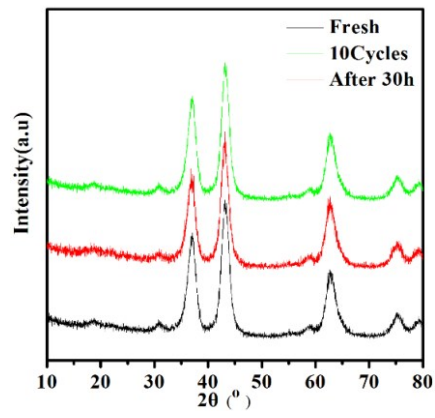

Fig. S2. XRD patterns of NiO-Co(0.3): Fresh, 10 cycles and long-time test after 30h.

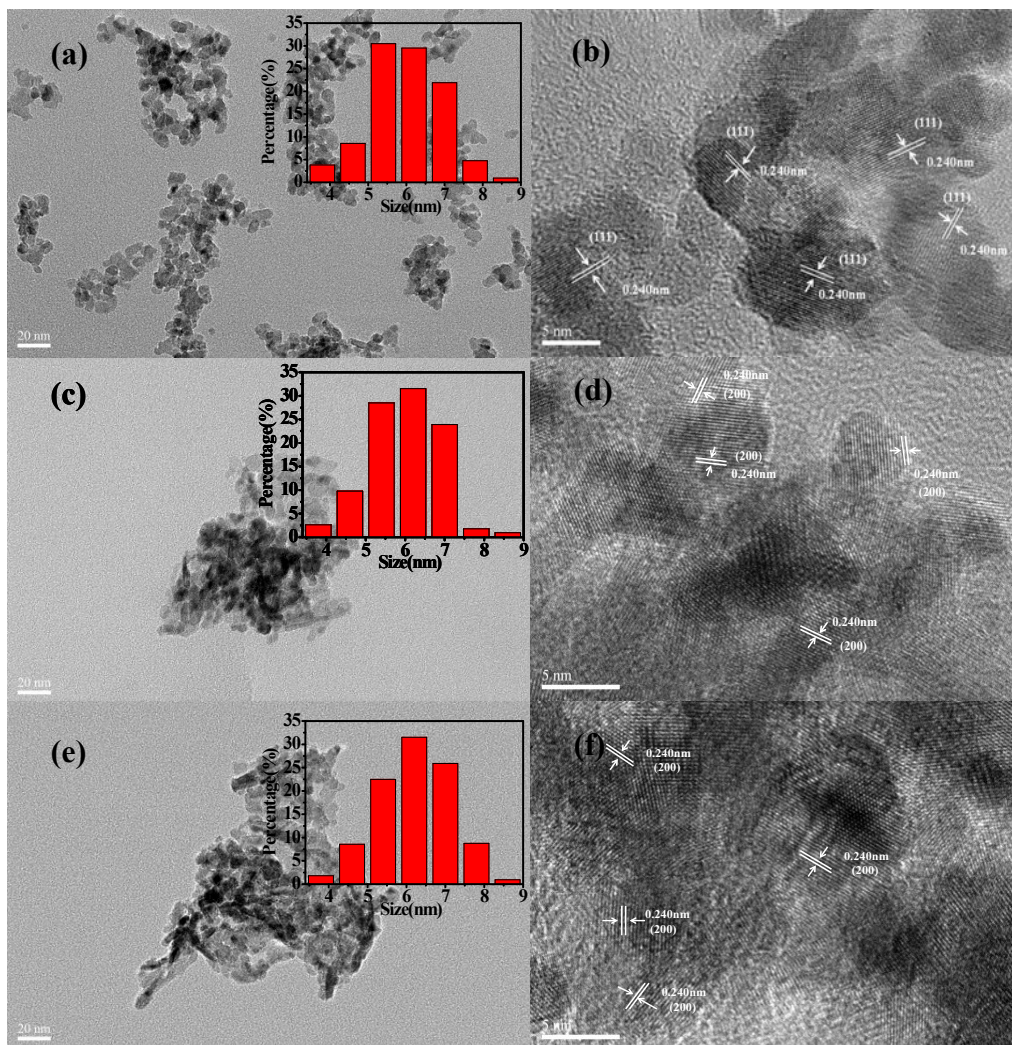

Fig. S3. TEM and HRTEM photos of NiO-Co(0.3): a, b-Fresh, c, d-10 cycles and e, f-long-time test after 30h.

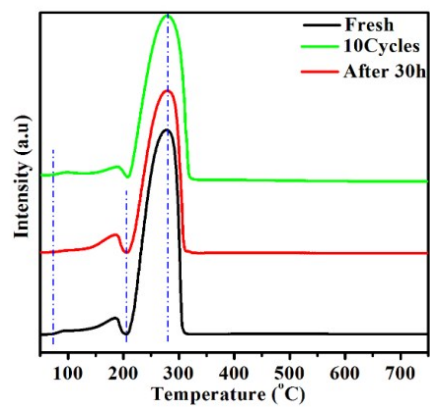

Fig. S4. H<sub>2</sub>-TPR profiles of NiO-Co(0.3): Fresh, 10 cycles and long-time test after 30h.
